# Supplementary material for: Enhanced performance of perovskite solar cells via a bilateral electron-donating passivator as a molecule bridge
Source: Royal Society of Chemistry journal article supplement (doi:10.1039/d3qi01531a), 2023-01-01
Supplement: d3qi01531a1.pdf [file d3qi01531a1.pdf]

# **Supporting Information for**

## **Enhanced performance of perovskite solar cells via**

## **bilateral electron-donating passivator as a molecule bridge**

Weichun Pan,<sup>§ a</sup> Pengxu Chen,<sup>§ a</sup> Sijia Zhu,<sup>a</sup> Ruowei He,<sup>a</sup> Qingshui Zheng,<sup>a</sup> Fengxian Cao,<sup>a</sup>

Zhang Lan,<sup>a</sup> Jihuai Wu,<sup>\* a</sup> Weihai Sun,<sup>\* a</sup> and Yunlong Li<sup>\* b</sup>

<sup>a</sup> *Engineering Research Center of Environment-Friendly Functional Materials, Ministry of Education, Institute of Materials Physical Chemistry, College of Materials Science & Engineering, Huaqiao University, Xiamen, 361021, China.*

<sup>b</sup> *Shenzhen Institute of Advanced Technology Chinese Academy of Sciences, Shenzhen, China.*

**This appendix include:**

**Figures S1~S15**

**Tables S1~S3**

---

\* Corresponding author: E-mail: [jhwu@hqu.edu.cn](mailto:jhwu@hqu.edu.cn); [sunweihai@hqu.edu.cn](mailto:sunweihai@hqu.edu.cn); [yl.li2@siat.ac.cn](mailto:yl.li2@siat.ac.cn)

§ These authors contributed equally to this work.

## Figures S1-S15

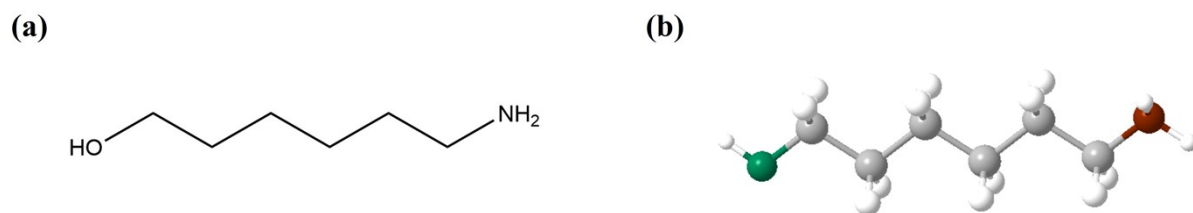

**Figure S1.** (a) The chemical structure of HAL. (b) The optimizing of geometries of HAL. The grey, white, green, and reddish brown atoms respectively represent the C, H, O, and N atoms.

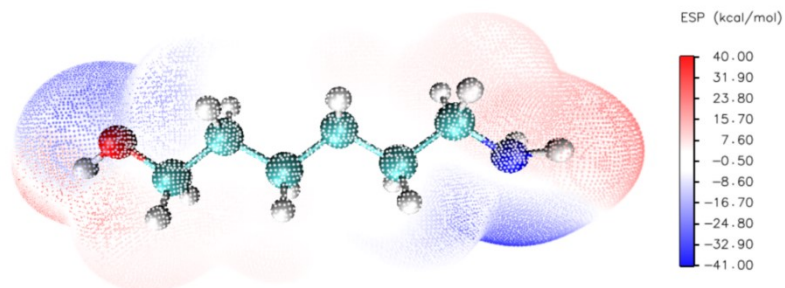

**Figure S2.** Electrostatic potential (ESP) map of HAL molecules.

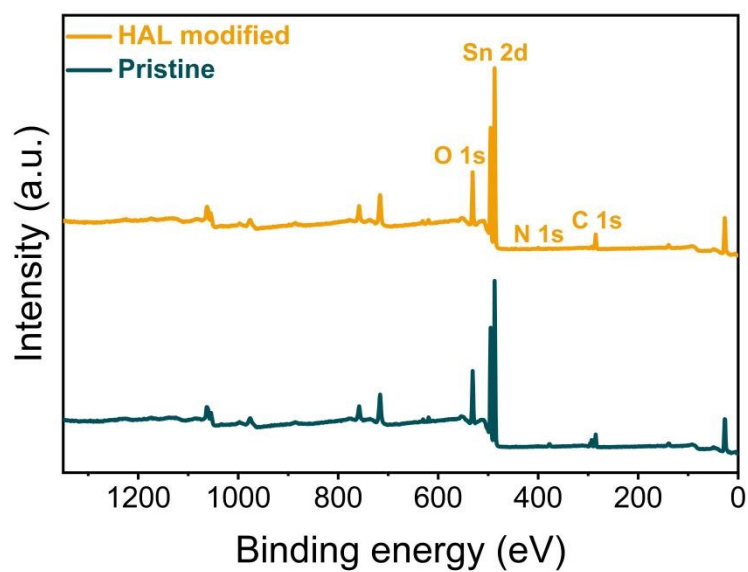

**Figure S3.** The XPS full spectra of the SnO<sub>2</sub> films without or with HAL modification.

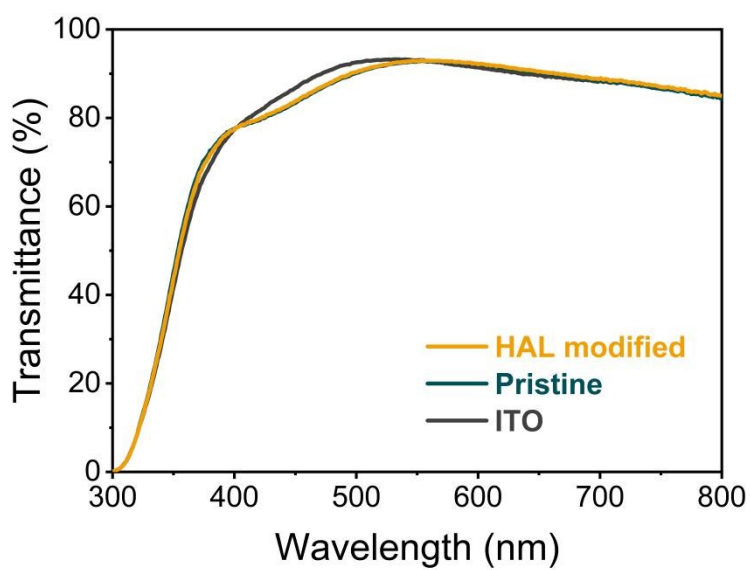

**Figure S4.** Transmittance spectra of the pristine SnO<sub>2</sub> film, HAL-modified SnO<sub>2</sub> film, and ITO substrate.

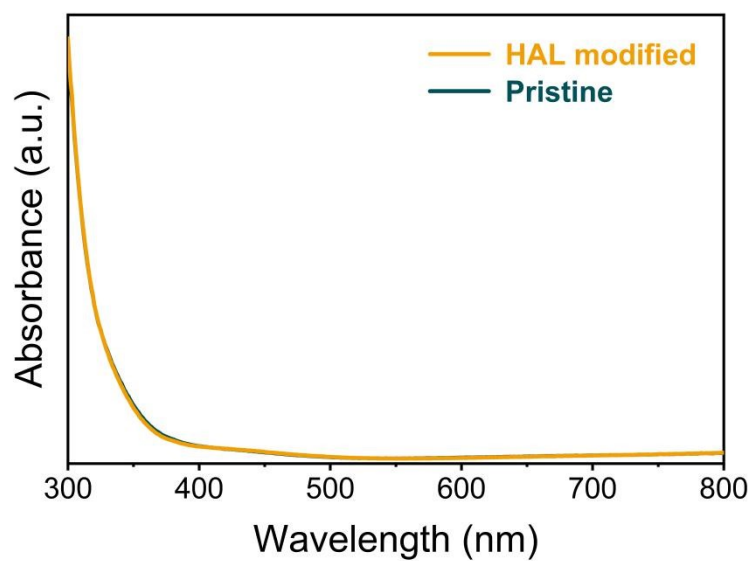

**Figure S5.** UV-vis absorption spectra of the SnO<sub>2</sub> films without or with HAL modification.

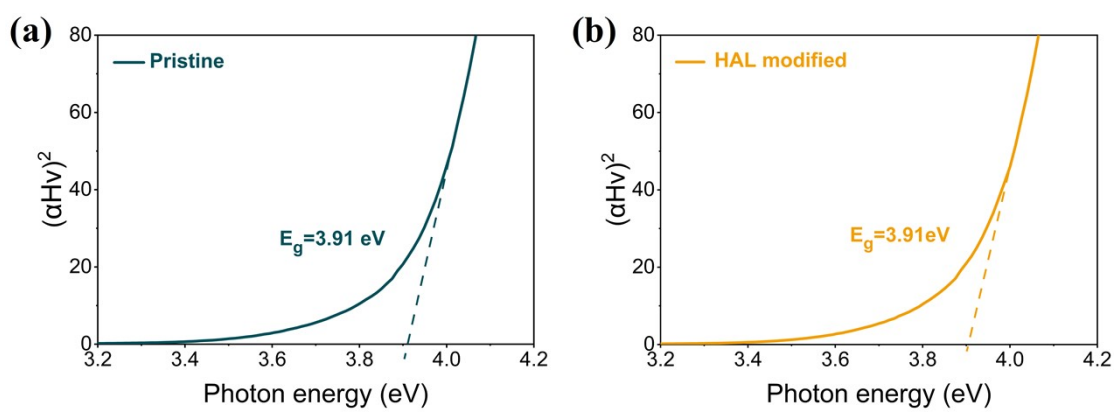

**Figure S6.** Optical band gap energy ( $E_g$ ) of the (a) pristine SnO<sub>2</sub> and (b) HAL-modified SnO<sub>2</sub> films.

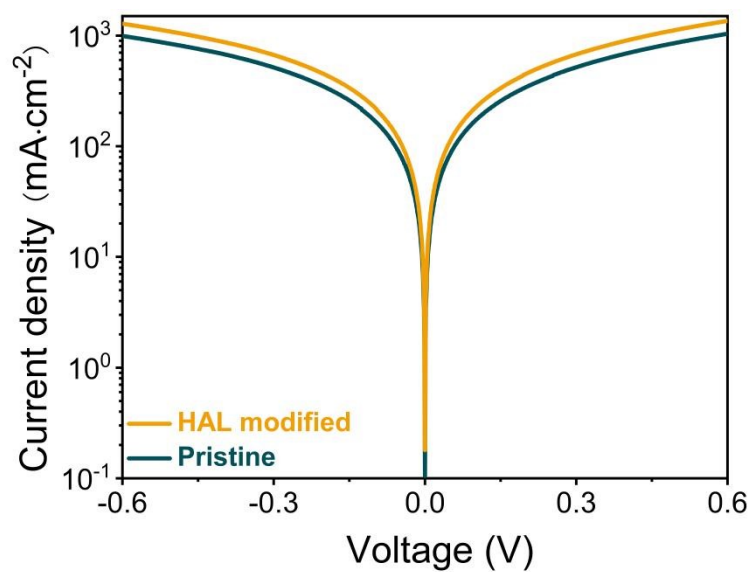

**Figure S7.** The Tafel curves of devices with a structure of ITO/SnO<sub>2</sub> (without and with HAL)/Au.

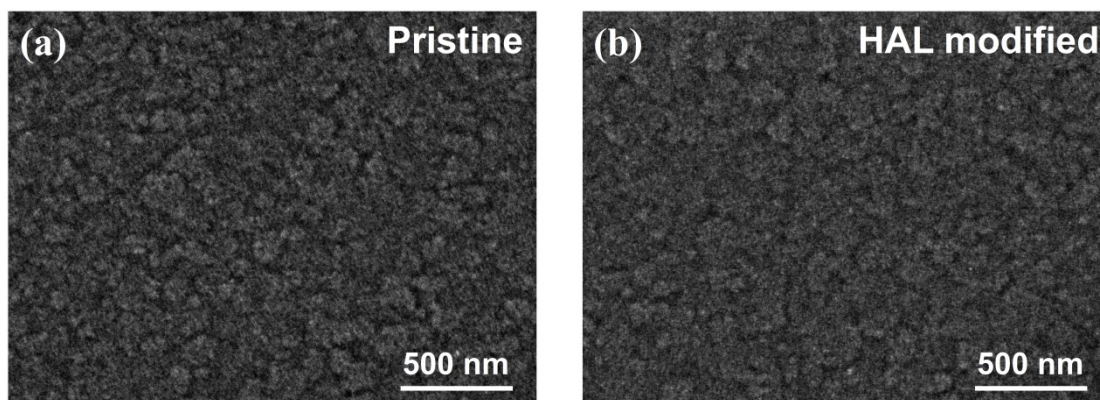

**Figure S8.** Top-view SEM images of the (a) pristine SnO<sub>2</sub> and (b) HAL-modified SnO<sub>2</sub> films.

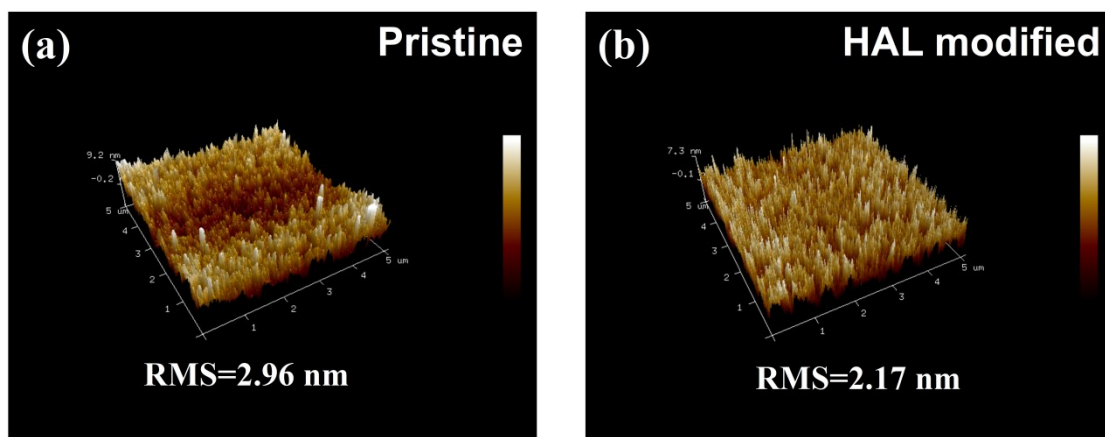

**Figure S9.** The AFM images of the (a) pristine SnO<sub>2</sub> and (b) HAL-modified SnO<sub>2</sub> films.

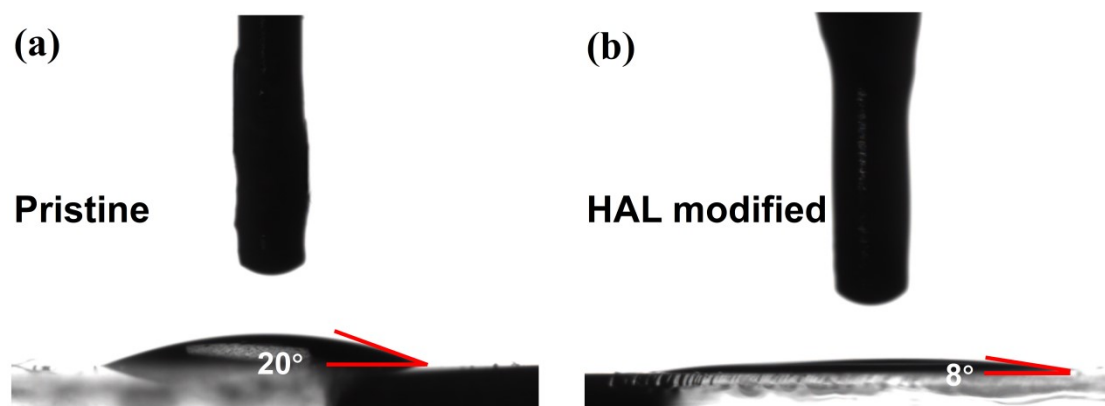

**Figure S10.** The contact angle measurements of the DMF/DMSO mixture solution on the (a) pristine SnO<sub>2</sub> and (b) HAL-modified SnO<sub>2</sub> substrates.

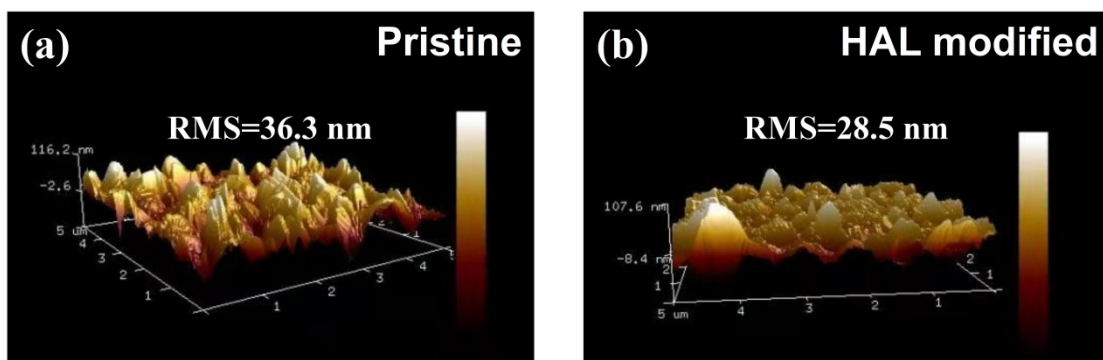

**Figure S11.** The AFM images of perovskite films on the (a) pristine SnO<sub>2</sub> and (b) HAL-modified SnO<sub>2</sub> films.

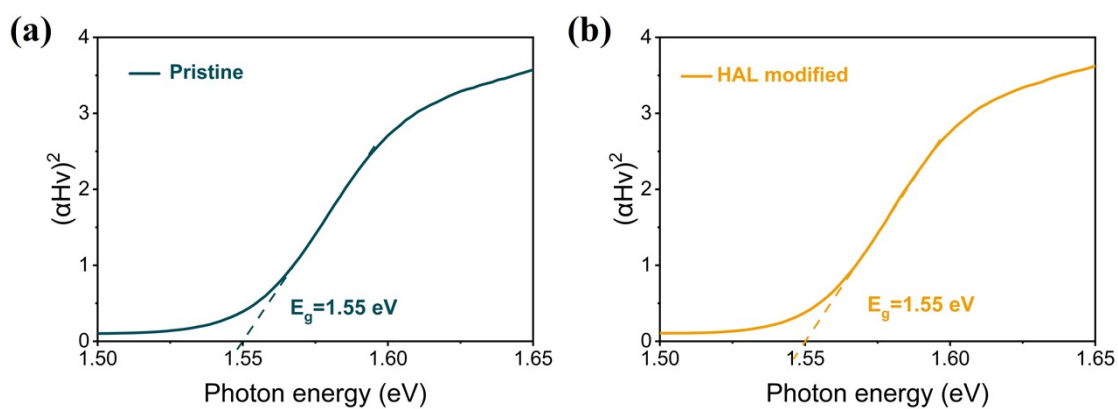

**Figure S12.** Optical band gap energy ( $E_g$ ) of perovskite films on the (a) pristine SnO<sub>2</sub> and (b) HAL-modified SnO<sub>2</sub> films.

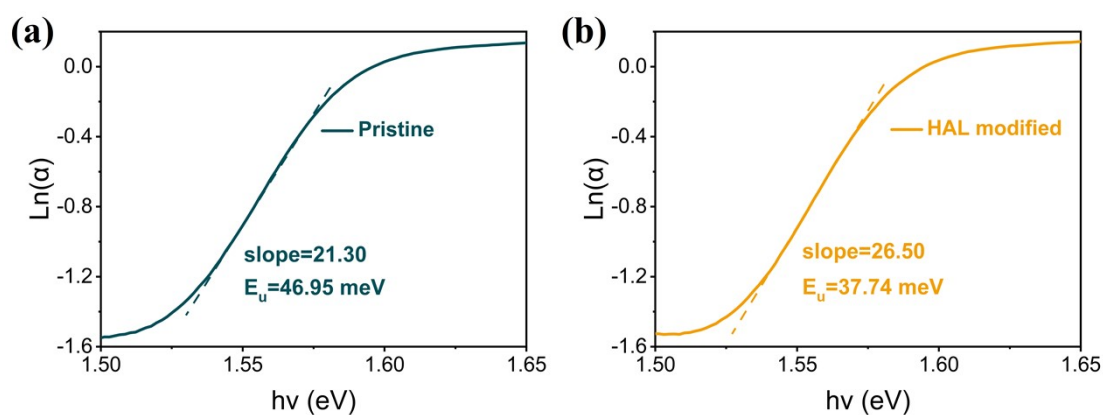

**Figure S13.** Logarithm of absorption coefficient ( $\alpha$ ) versus photon energy and the Urbach energy calculated in the perovskite based on the (a) pristine  $\text{SnO}_2$  and (b) HAL-modified  $\text{SnO}_2$  films.

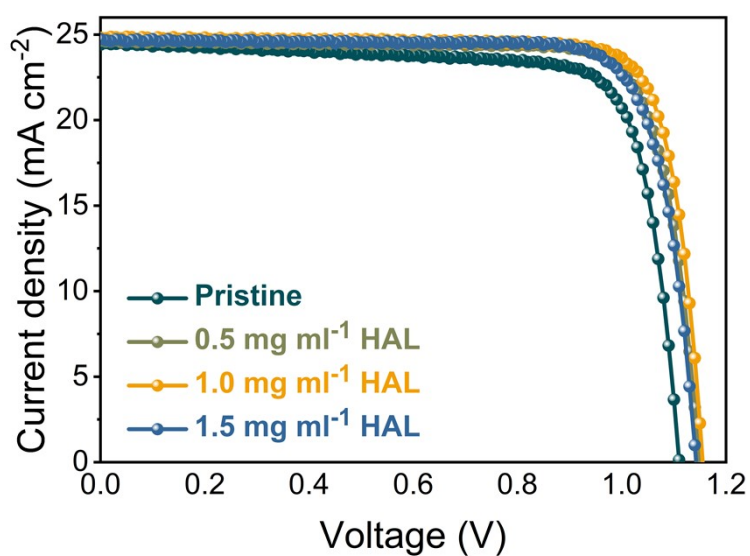

**Figure S14.**  $J-V$  curves of the pristine device and the devices modified with different concentrations of HAL solutions.

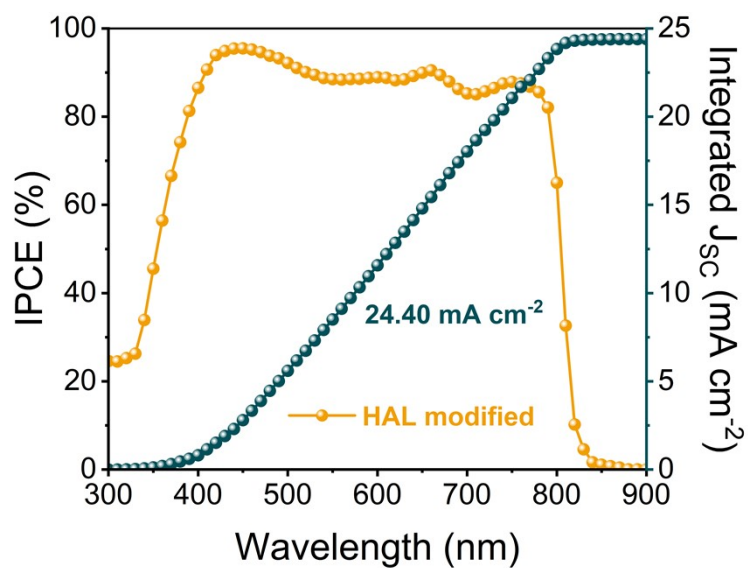

**Figure S15.** EQE spectrum and integrated current density of the HAL-modified device. The integrated current density is  $24.40 \text{ mA cm}^{-2}$ .

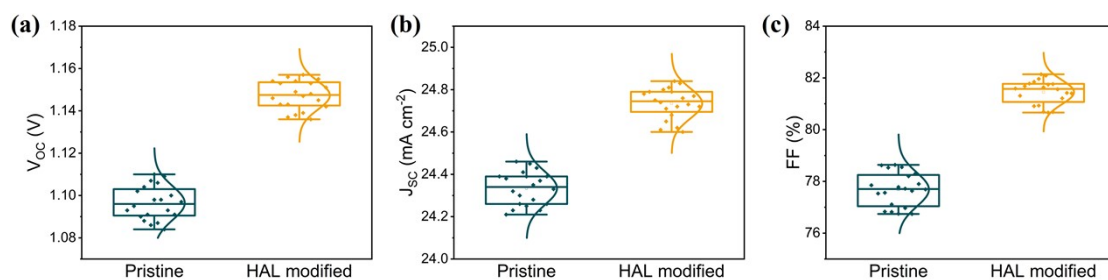

**Figure S16.** (a)  $V_{OC}$ , (b)  $J_{SC}$ , and (c) FF statistical diagrams of pristine and HAL-modified devices.

## Tables S1-S3

**Table S1** Energy levels of pristine SnO<sub>2</sub> film and HAL-modified SnO<sub>2</sub> film.

| Samples      | E <sub>cutoff</sub><br>(eV) | W <sub>F</sub><br>(eV) | E <sub>onset</sub><br>(eV) | E <sub>VBM</sub><br>(eV) | E <sub>CBM</sub><br>(eV) | E <sub>g</sub> (eV) |
|--------------|-----------------------------|------------------------|----------------------------|--------------------------|--------------------------|---------------------|
| Pristine     | 16.76                       | 4.46                   | 3.73                       | -8.19                    | -4.28                    | 3.91                |
| HAL-modified | 16.68                       | 4.54                   | 3.76                       | -8.30                    | -4.39                    | 3.91                |

**Table S2** TRPL parameters of perovskite on SnO<sub>2</sub> films without or with HAL modification from Figure 3d.

| Samples      | $\tau_{avg}$ (ns) | $\tau_1$ (ns) | $\tau_2$ (ns) | A <sub>1</sub> (%) | A <sub>2</sub> (%) |
|--------------|-------------------|---------------|---------------|--------------------|--------------------|
| Pristine     | 96.56             | 35.93         | 113.41        | 21.74              | 78.26              |
| HAL-modified | 64.36             | 22.39         | 78.58         | 25.30              | 74.70              |

**Table S3.** Electrical impedance of the PSCs without or with HAL modification.

| Samples      | R <sub>s</sub> (Ω) | R <sub>ct</sub> (Ω) | R <sub>rec</sub> (Ω) |
|--------------|--------------------|---------------------|----------------------|
| Pristine     | 11.55              | 54.09               | 28.32                |
| HAL-modified | 10.84              | 24.45               | 90.07                |

**Table S4** Photovoltaic data of PSCs based on SnO<sub>2</sub> films without or with HAL modification.

| Samples                 | V <sub>OC</sub> (V) | J <sub>SC</sub> (mA cm <sup>-2</sup> ) | FF (%) | PCE (%) |
|-------------------------|---------------------|----------------------------------------|--------|---------|
| Pristine                | 1.110               | 24.41                                  | 78.61  | 21.30   |
| 0.5 mg mL <sup>-1</sup> | 1.148               | 24.66                                  | 81.19  | 22.99   |
| 1.0 mg mL <sup>-1</sup> | 1.155               | 24.82                                  | 82.27  | 23.58   |
| 1.5 mg mL <sup>-1</sup> | 1.142               | 24.75                                  | 80.90  | 22.87   |

**Table S5** Photovoltaic data statistics of 20 PSCs based on SnO<sub>2</sub> films without or with HAL modification.

| Samples      | $V_{OC}$ (V) | $J_{SC}$ (mA cm <sup>-2</sup> ) | FF (%)     | PCE (%)    |
|--------------|--------------|---------------------------------|------------|------------|
| Pristine     | 1.095±0.008  | 24.33±0.08                      | 77.69±0.65 | 20.73±0.25 |
| HAL-modified | 1.147±0.007  | 24.74±0.07                      | 81.45±0.47 | 23.11±0.22 |
